# Supplementary material
Source: PubMed Central journal article supplement (PMC2939748)
Supplement: NIHMS157778-supplement-supporting_data.pdf [file NIHMS157778-supplement-supporting_data.pdf]

OCT 15 1998

SUPPORTING INFORMATION

**Structure and Base Pairing Properties of a Replicable Nonpolar Isostere for Deoxyadenosine**

Kevin M. Guckian, Juan C. Morales, and Eric T. Kool\*

Department of Chemistry, University of Rochester, Rochester, NY 14627

**Proton NMR spectra. (pages 2-7)**

(p. 2) 1-[2-Deoxy-3,5,-bis-O-(4-toluoyl)- $\beta$ -D-*erythro*-pentofuranosyl]-4-methyl-1*H*-benzimidazole (6).

(p. 3) 1-[2-Deoxy- $\beta$ -D-*erythro*-pentofuranosyl]-4-methyl-1*H*-benzimidazole (1).

(p. 4) 1-[2-Deoxy-5-O-(4,4'-dimethoxytriphenylmethyl)- $\beta$ -D-*erythro*-pentofuranosyl]-4-methyl-1*H*-benzimidazole (7).

(p. 5) 2-Deoxy-5-O-(4,4'-dimethoxytriphenylmethyl)-3-O-(2-cyanoethyl N,N-diisopropylphosphoramidite)-1-(4-methyl-1*H*-benzimidazolyl)- $\beta$ -D-*erythro*-pentofuranose (8a).

(p. 6) 2-Deoxy-5-O-(4,4'-dimethoxytriphenylmethyl)-3-O-(2-cyanoethyl N,N-diisopropylphosphoramidite)-1-(4-methyl-1*H*-benzimidazolyl)- $\beta$ -D-*erythro*-pentofuranose (8b).

(p. 7) Oligodeoxynucleotide having the sequence 5'-dTZT (9).

**Supporting x-ray data for compound 1. (pages 8-12)**

(p. 8) Crystal data.

(p. 9) ORTEP plot.

(p. 10) Atomic coordinates.

(p. 11) Bond lengths and angles.

(p. 12) Anisotropic displacement parameters.

**Mass spectral data for strand containing Z. (page 13)**

(p.13) Electrospray MS data for oligodeoxynucleotide having the sequence 5'-CTT TTC ZTT CTT (10).

**Thermodynamic data for duplexes. (page 14)**

(p. 14) Van't Hoff plots for six duplexes in Table 2.

**Synthesis of 4-methyl-1*H*-benzimidazole derivatives. (page 15-16)**

(p. 15) 1-[2-Deoxy-3,5,-bis-O-(4-toluoyl)- $\beta$ -D-*erythro*-pentofuranosyl]-4-methyl-1*H*-benzimidazole (6).

(p. 15) 1-[2-Deoxy- $\beta$ -D-*erythro*-pentofuranosyl]-4-methyl-1*H*-benzimidazole (1).

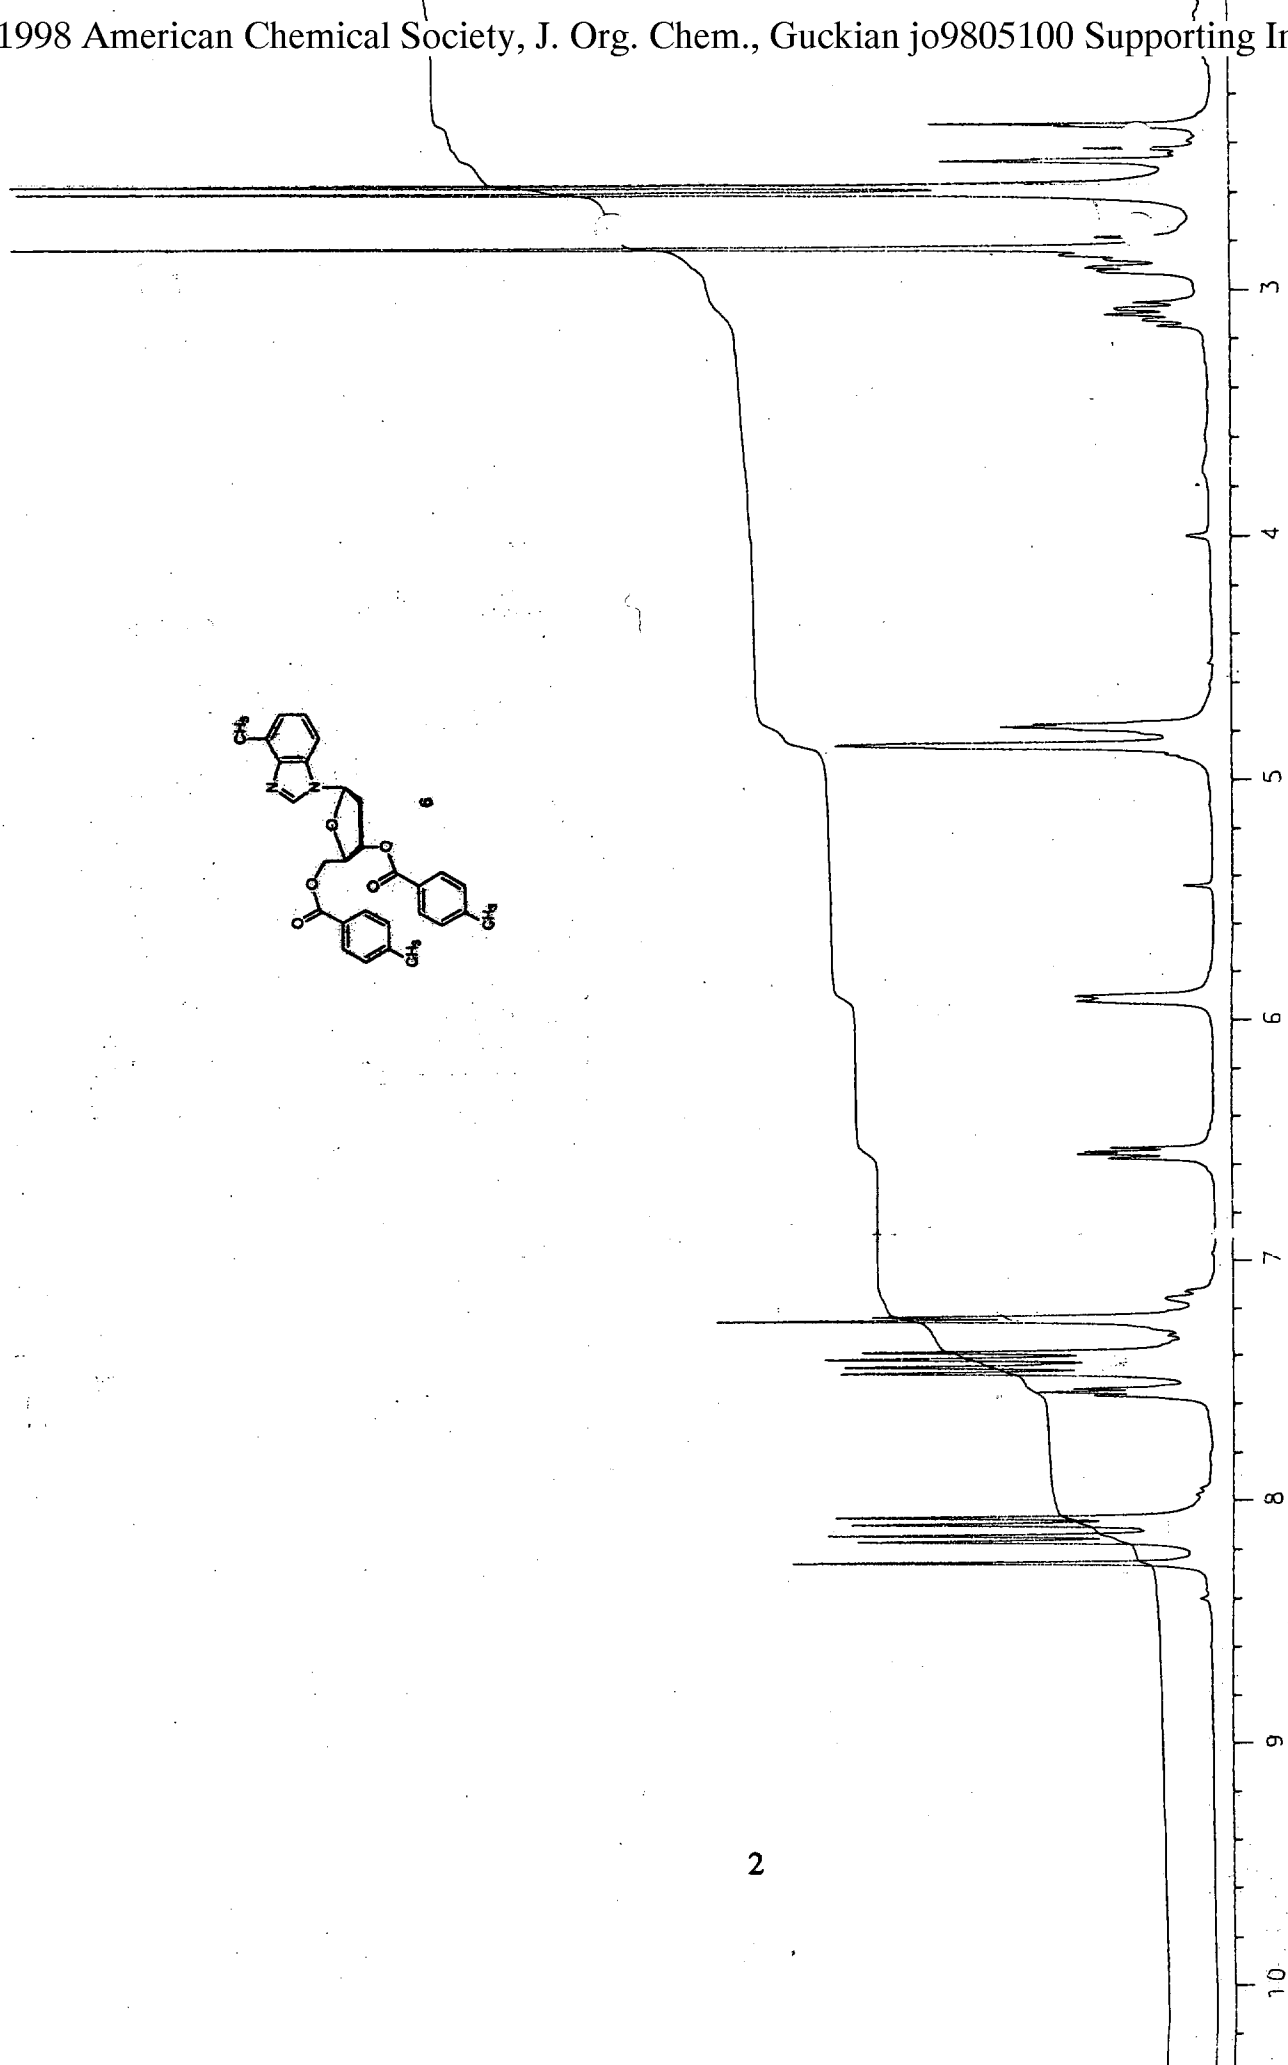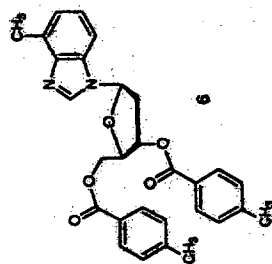

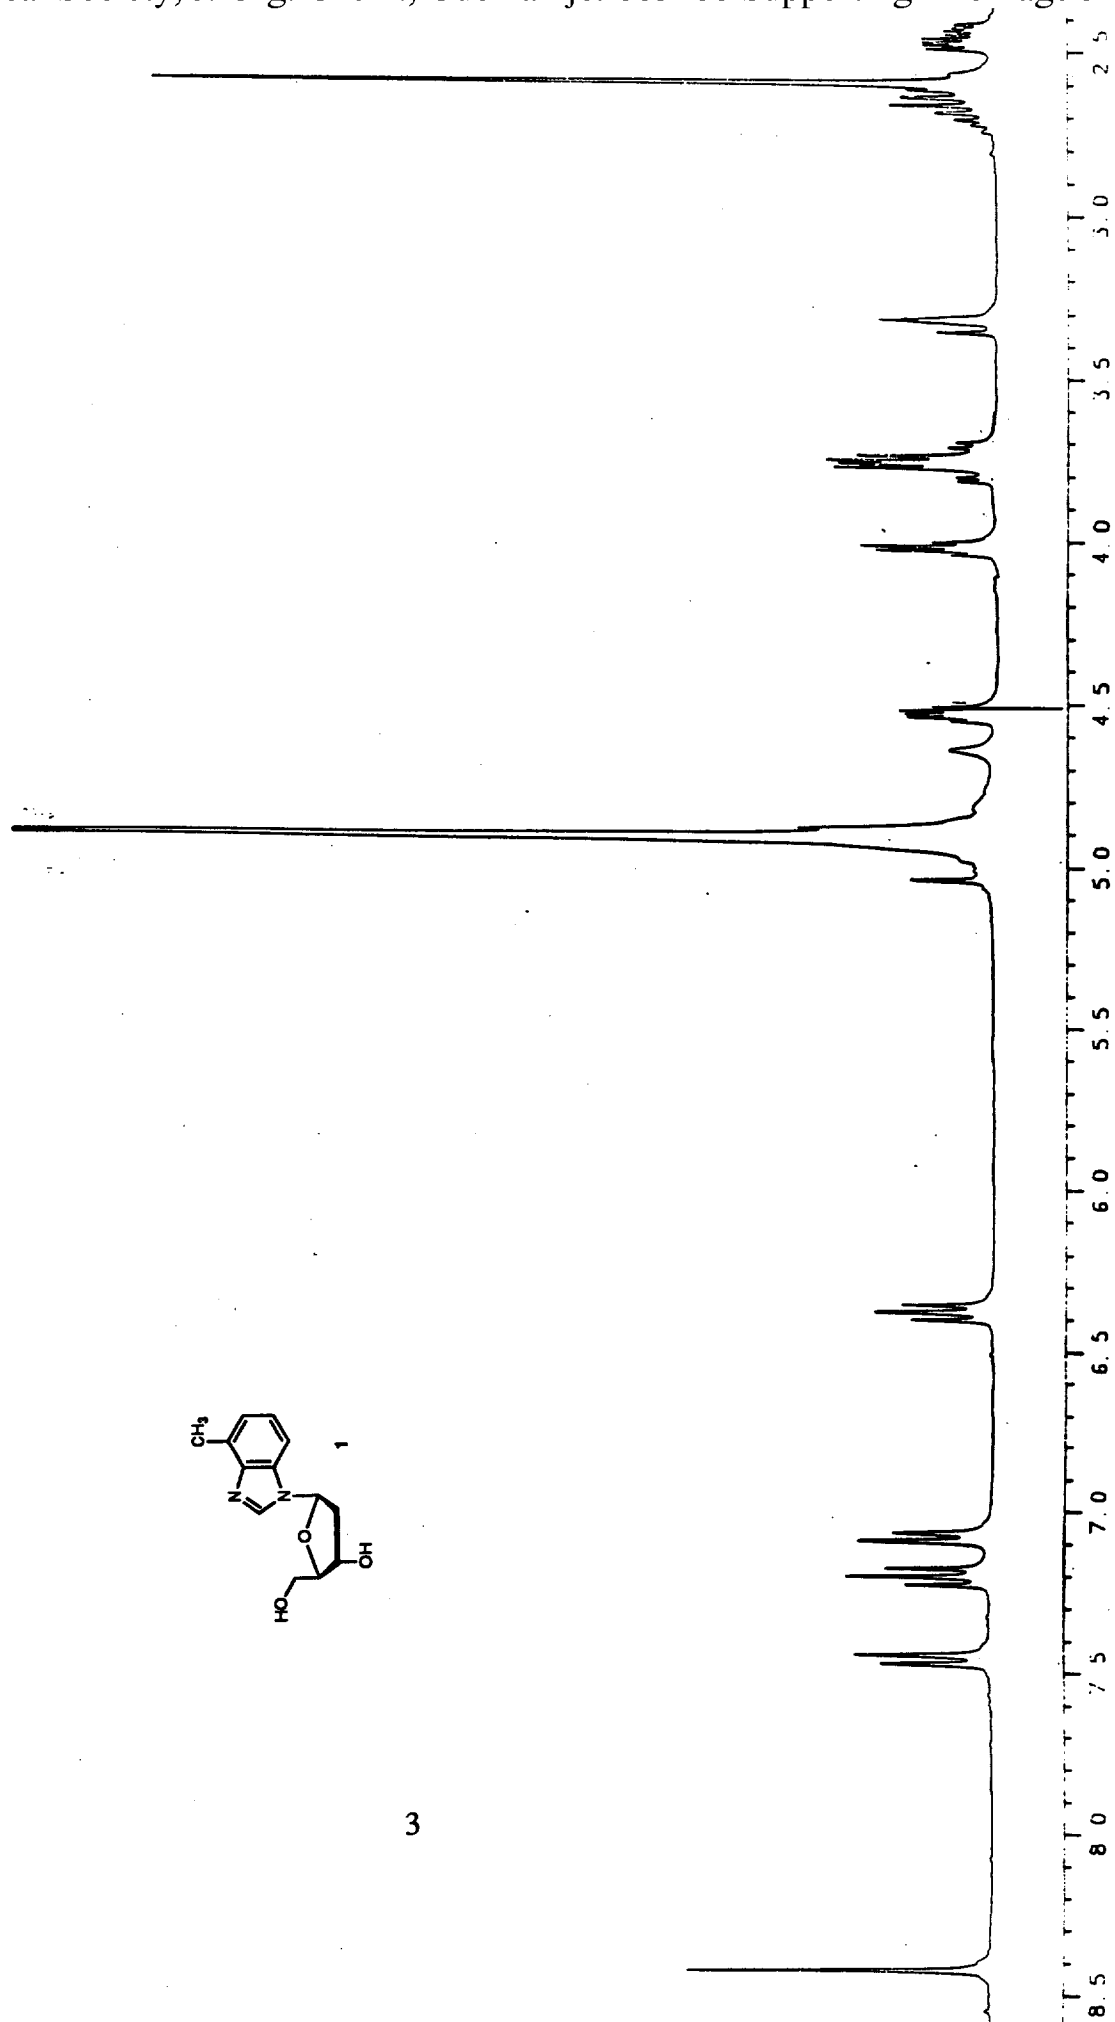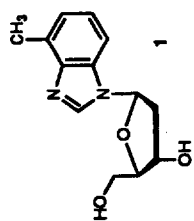

3

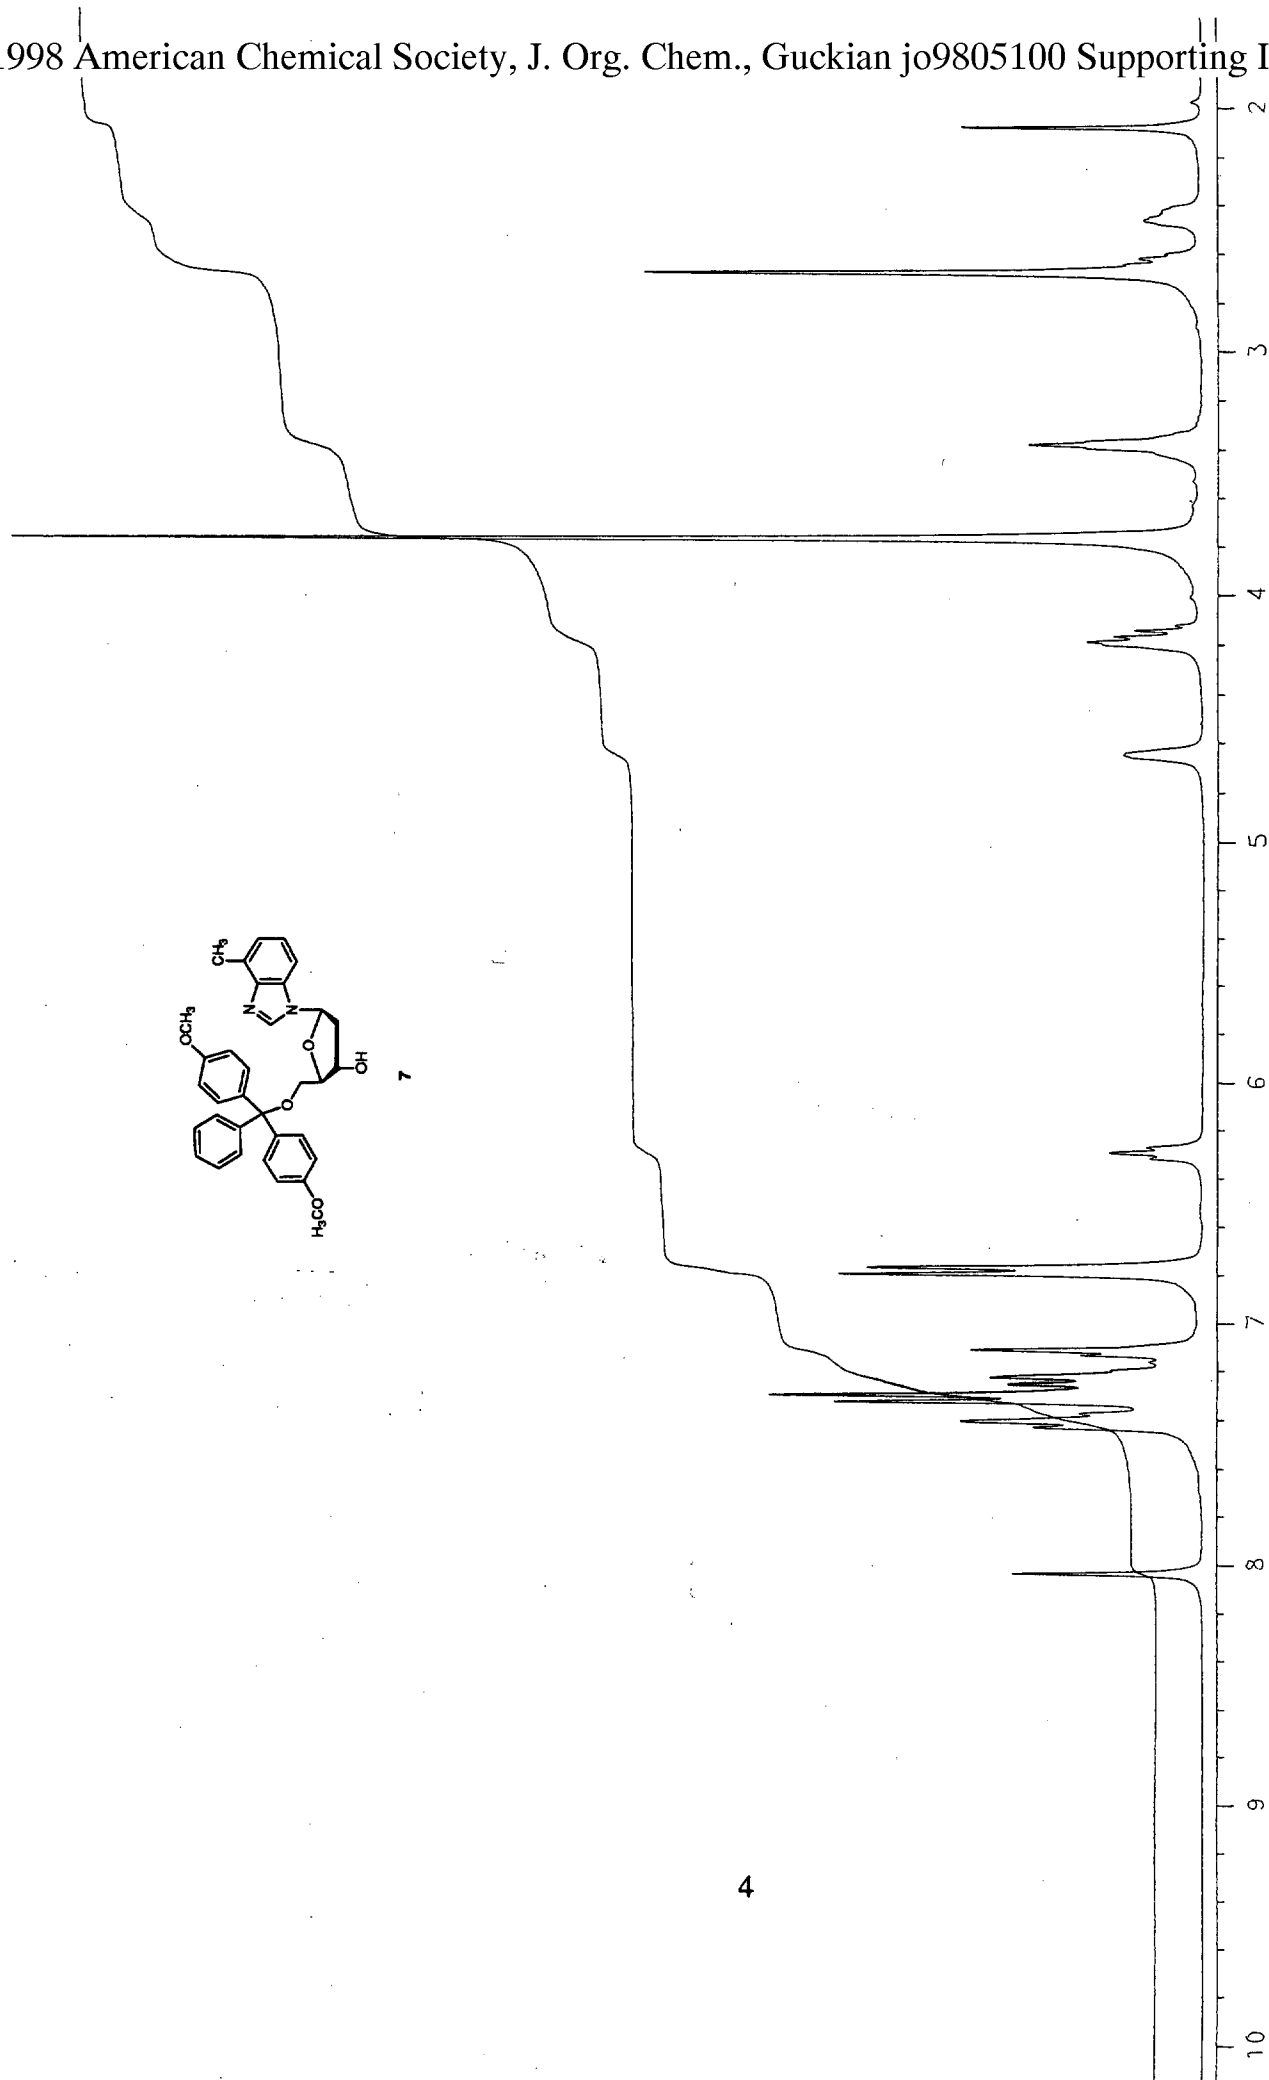



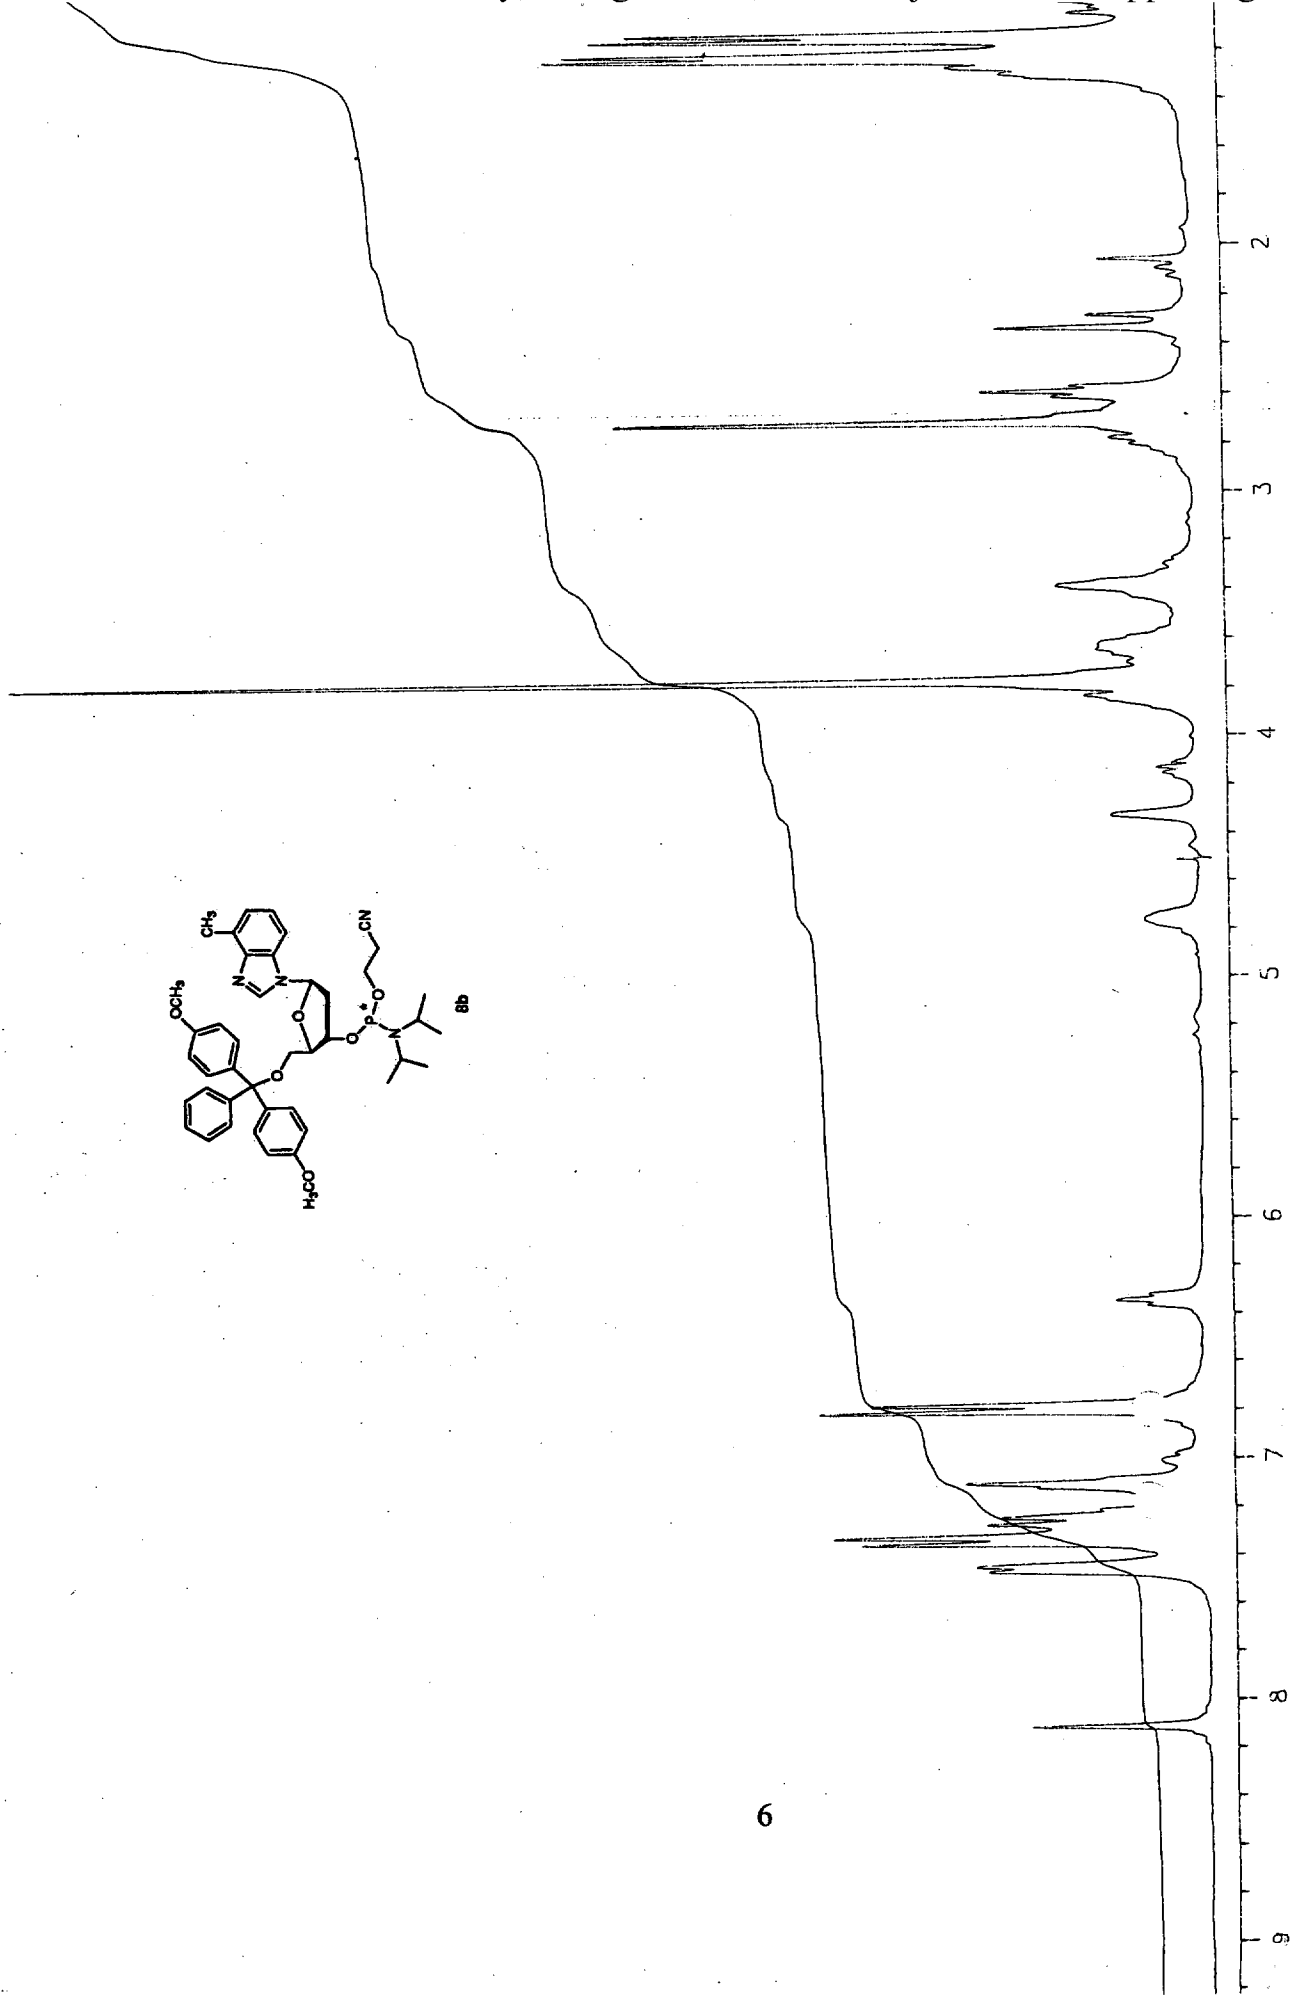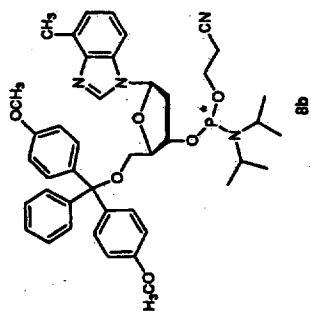



|                                      |                                                                                                                     |
|--------------------------------------|---------------------------------------------------------------------------------------------------------------------|
| Empirical formula                    | $C_{13}H_{19}N_2O_4$                                                                                                |
| Formula weight                       | 267.30                                                                                                              |
| Temperature                          | 223(2) K                                                                                                            |
| Wavelength                           | 0.71073 Å                                                                                                           |
| Crystal system                       | Orthorhombic                                                                                                        |
| Space group                          | $P2_12_12_1$                                                                                                        |
| unit cell dimensions                 | $a = 7.104(6)$ Å $\alpha = 90^\circ$<br>$b = 8.716(8)$ Å $\beta = 90^\circ$<br>$c = 21.67(2)$ Å $\gamma = 90^\circ$ |
| Volume, Z                            | 1342 (2) Å <sup>3</sup> , 4                                                                                         |
| Density (calculated)                 | 1.323 Mg/m <sup>3</sup>                                                                                             |
| Absorption coefficient               | 0.099 mm <sup>-1</sup>                                                                                              |
| F(000)                               | 572                                                                                                                 |
| Crystal size                         | .4 X .08 X .08 mm <sup>3</sup>                                                                                      |
| $\theta$ range for data collection   | 1.88 to 28.27°                                                                                                      |
| Limiting indices                     | $-9 \leq h \leq 9, -10 \leq k \leq 11, -22 \leq l \leq 28$                                                          |
| Reflections collected                | 8410                                                                                                                |
| Independent reflections              | 3155 ( $R_{int} = 0.0755$ )                                                                                         |
| Absorption correction                | SADABS                                                                                                              |
| Refinement method                    | full matrix least-squares on $F^2$                                                                                  |
| Data / restraints / parameters       | 3155 / 0 / 184                                                                                                      |
| Goodness-of-fit on $F^2$             | 0.926                                                                                                               |
| Final R indices [ $I > 2\sigma(I)$ ] | $R1 = 0.0683, wR2 = 0.1618$                                                                                         |
| R indices (all data)                 | $R1 = 0.0995, wR2 = 0.1756$                                                                                         |
| Absolute structure parameter         | 0 (2)                                                                                                               |
| Largest diff. peak and hole          | 0.235 and -0.568 eÅ <sup>-3</sup>                                                                                   |



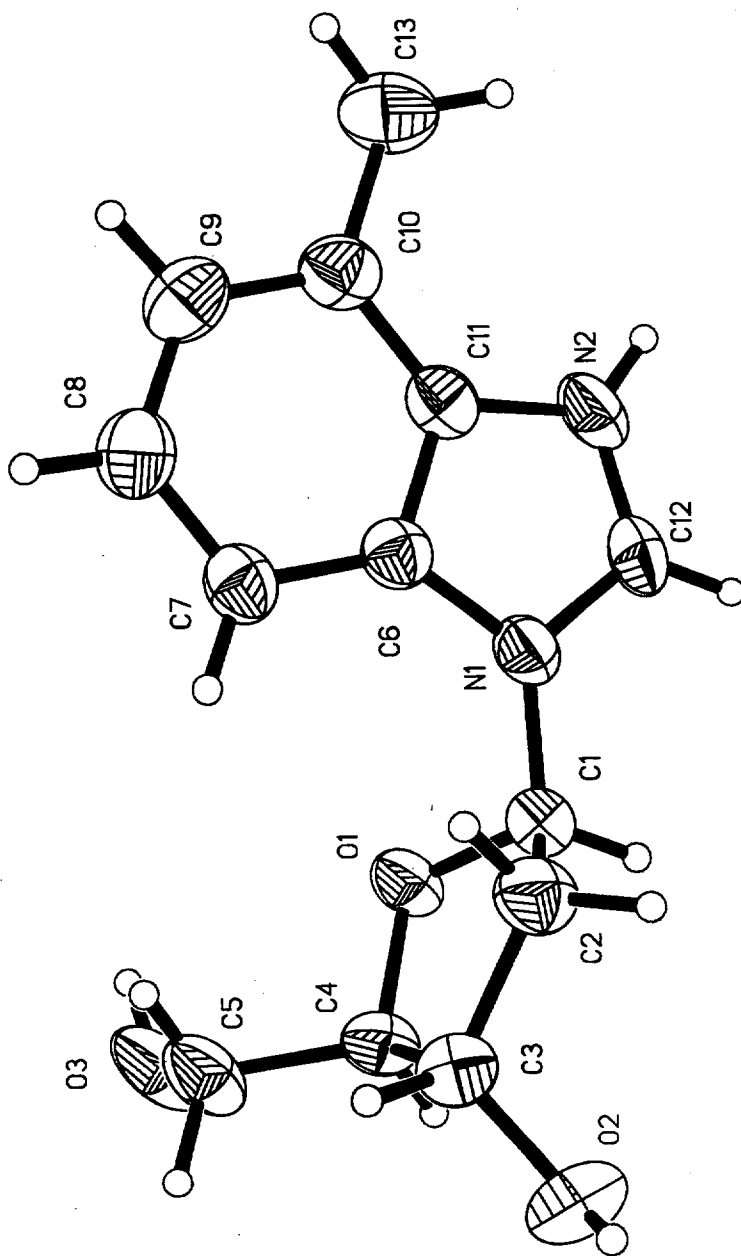

Table 2. Atomic coordinates [ $\times 10^4$ ] and equivalent isotropic displacement parameters [ $\text{\AA}^2 \times 10^3$ ] for 1.  $U(\text{eq})$  is defined as one third of the trace of the orthogonalized  $U_{ij}$  tensor.

|       | x         | y         | z        | U(eq)  |
|-------|-----------|-----------|----------|--------|
| O(1)  | 9124 (3)  | 9106 (2)  | 1407 (1) | 38 (1) |
| O(2)  | 7712 (3)  | 11671 (3) | 336 (1)  | 50 (1) |
| O(3)  | 8723 (5)  | 6545 (3)  | 571 (1)  | 67 (1) |
| N(1)  | 10447 (3) | 10425 (3) | 2216 (1) | 38 (1) |
| N(2)  | 11227 (4) | 10553 (3) | 3212 (1) | 45 (1) |
| C(1)  | 9299 (5)  | 10593 (3) | 1665 (1) | 39 (1) |
| C(2)  | 10120 (5) | 11577 (4) | 1157 (2) | 43 (1) |
| C(3)  | 9299 (4)  | 10878 (3) | 565 (2)  | 36 (1) |
| C(4)  | 8643 (4)  | 9277 (3)  | 766 (1)  | 37 (1) |
| C(5)  | 9532 (6)  | 7990 (4)  | 417 (2)  | 50 (1) |
| C(6)  | 12201 (4) | 9748 (3)  | 2263 (1) | 36 (1) |
| C(7)  | 13398 (4) | 9068 (4)  | 1831 (2) | 41 (1) |
| C(8)  | 15047 (5) | 8488 (4)  | 2048 (2) | 48 (1) |
| C(9)  | 15532 (5) | 8574 (4)  | 2673 (2) | 50 (1) |
| C(10) | 14390 (5) | 9264 (4)  | 3107 (2) | 44 (1) |
| C(11) | 12676 (4) | 9827 (4)  | 2893 (2) | 39 (1) |
| C(12) | 9935 (5)  | 10877 (4) | 2802 (2) | 42 (1) |
| C(13) | 14964 (6) | 9388 (5)  | 3777 (2) | 64 (1) |
| O(4)  | 4001 (4)  | 10816 (3) | 237 (1)  | 42 (1) |

Table 4. Bond lengths [Å] and angles [°] for 1.

|                   |          |                  |          |
|-------------------|----------|------------------|----------|
| O(1)-C(1)         | 1.418(4) | O(1)-C(4)        | 1.438(4) |
| O(2)-C(3)         | 1.413(4) | O(3)-C(5)        | 1.424(4) |
| N(1)-C(12)        | 1.378(4) | N(1)-C(6)        | 1.383(4) |
| N(1)-C(1)         | 1.453(4) | N(2)-C(12)       | 1.309(4) |
| N(2)-C(11)        | 1.392(4) | C(1)-C(2)        | 1.514(5) |
| C(2)-C(3)         | 1.534(5) | C(3)-C(4)        | 1.534(4) |
| C(4)-C(5)         | 1.493(4) | C(6)-C(7)        | 1.398(4) |
| C(6)-C(11)        | 1.408(5) | C(7)-C(8)        | 1.361(5) |
| C(8)-C(9)         | 1.399(5) | C(9)-C(10)       | 1.381(5) |
| C(10)-C(11)       | 1.392(5) | C(10)-C(13)      | 1.511(5) |
| <hr/>             |          |                  |          |
| C(1)-O(1)-C(4)    | 107.9(2) | C(12)-N(1)-C(6)  | 107.0(3) |
| C(12)-N(1)-C(1)   | 125.4(3) | C(6)-N(1)-C(1)   | 127.6(3) |
| C(12)-N(2)-C(11)  | 106.2(3) | O(1)-C(1)-N(1)   | 106.4(2) |
| O(1)-C(1)-C(2)    | 105.3(2) | N(1)-C(1)-C(2)   | 116.0(3) |
| C(1)-C(2)-C(3)    | 103.7(3) | O(2)-C(3)-C(2)   | 113.7(3) |
| O(2)-C(3)-C(4)    | 107.6(2) | C(2)-C(3)-C(4)   | 103.9(2) |
| O(1)-C(4)-C(5)    | 108.1(3) | O(1)-C(4)-C(3)   | 107.2(2) |
| C(5)-C(4)-C(3)    | 114.3(3) | O(3)-C(5)-C(4)   | 112.1(3) |
| N(1)-C(6)-C(7)    | 132.8(3) | N(1)-C(6)-C(11)  | 105.5(3) |
| C(7)-C(6)-C(11)   | 121.7(3) | C(8)-C(7)-C(6)   | 116.7(3) |
| C(7)-C(8)-C(9)    | 121.9(3) | C(10)-C(9)-C(8)  | 122.6(3) |
| C(9)-C(10)-C(11)  | 116.1(3) | C(9)-C(10)-C(13) | 121.8(3) |
| C(11)-C(10)-C(13) | 122.1(3) | N(2)-C(11)-C(10) | 129.9(3) |
| N(2)-C(11)-C(6)   | 109.1(3) | C(10)-C(11)-C(6) | 121.0(3) |
| N(2)-C(12)-N(1)   | 112.3(3) |                  |          |

Symmetry transformations used to generate equivalent atoms:

Table 5. Anisotropic displacement parameters [ $\text{\AA}^2 \times 10^3$ ] for 1.

The anisotropic displacement factor exponent takes the form:

$$-2\pi^2 [ (ha^*)^2 U_{11} + \dots + 2hka^*b^* U_{12} ]$$

|       | U11    | U22   | U33   | U23    | U13    | U12   |
|-------|--------|-------|-------|--------|--------|-------|
| O(1)  | 52(1)  | 35(1) | 27(1) | -1(1)  | 2(1)   | -4(1) |
| O(2)  | 39(1)  | 47(1) | 64(2) | 19(1)  | -12(1) | -6(1) |
| O(3)  | 134(3) | 35(1) | 30(1) | -1(1)  | 1(2)   | -4(2) |
| N(1)  | 37(2)  | 44(2) | 34(1) | -10(1) | 1(1)   | 2(1)  |
| N(2)  | 63(2)  | 43(2) | 28(1) | -10(1) | 4(1)   | 1(1)  |
| C(1)  | 41(2)  | 39(2) | 36(2) | -5(1)  | -2(1)  | 2(1)  |
| C(2)  | 51(2)  | 35(2) | 44(2) | -1(2)  | -6(2)  | -4(2) |
| C(3)  | 32(2)  | 39(2) | 38(2) | 4(1)   | -1(1)  | -5(1) |
| C(4)  | 43(2)  | 39(2) | 30(2) | 3(1)   | -3(1)  | -4(1) |
| C(5)  | 86(3)  | 35(2) | 29(2) | 1(1)   | 5(2)   | -1(2) |
| C(6)  | 36(2)  | 34(2) | 38(2) | -2(1)  | 0(1)   | -4(1) |
| C(7)  | 42(2)  | 44(2) | 38(2) | -3(2)  | 6(1)   | -1(2) |
| C(8)  | 45(2)  | 49(2) | 51(2) | 1(2)   | 9(2)   | 1(2)  |
| C(9)  | 45(2)  | 50(2) | 54(2) | 11(2)  | -1(2)  | 4(2)  |
| C(10) | 53(2)  | 41(2) | 39(2) | 5(2)   | -4(2)  | -1(2) |
| C(11) | 45(2)  | 36(2) | 36(2) | -2(1)  | 1(1)   | -3(1) |
| C(12) | 46(2)  | 41(2) | 40(2) | -12(2) | 10(2)  | 5(2)  |
| C(13) | 76(3)  | 76(3) | 41(2) | 7(2)   | -12(2) | 5(2)  |
| O(4)  | 39(2)  | 43(1) | 45(1) | -4(1)  | -1(1)  | 1(1)  |

ES-MS spectrum of DNA 12mer:

5'-CTT TTC ZTT CTT (10)

Calculated mass: 3550

Found mass: 3548

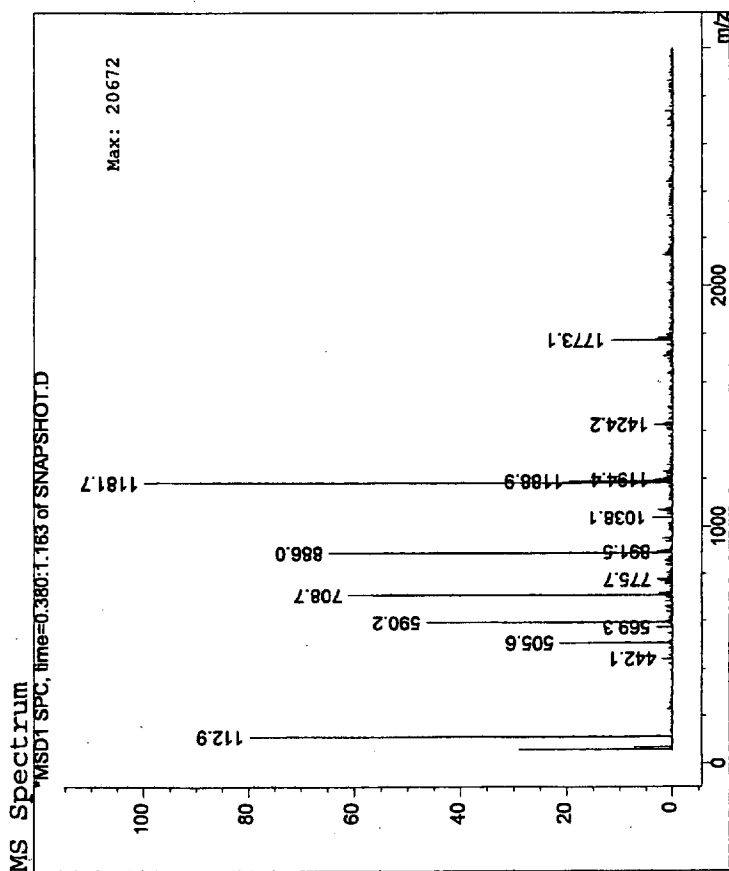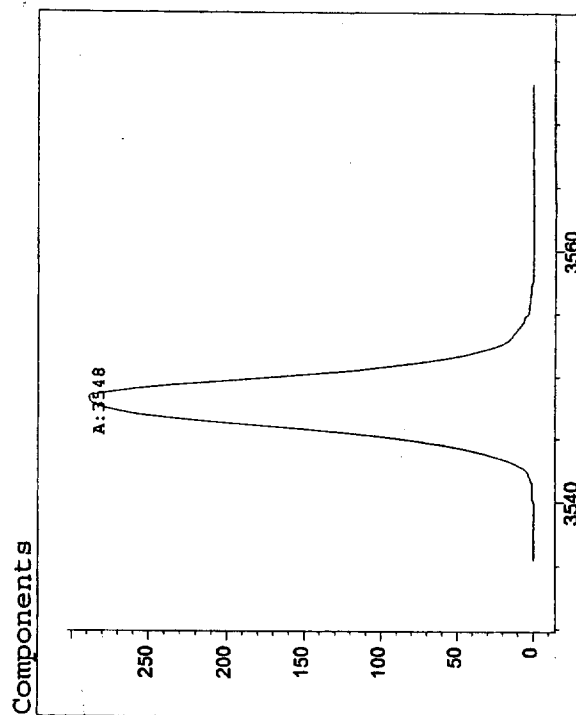

Van't Hoff plots for melting measurements on DNA duplexes (Table 2 in text)

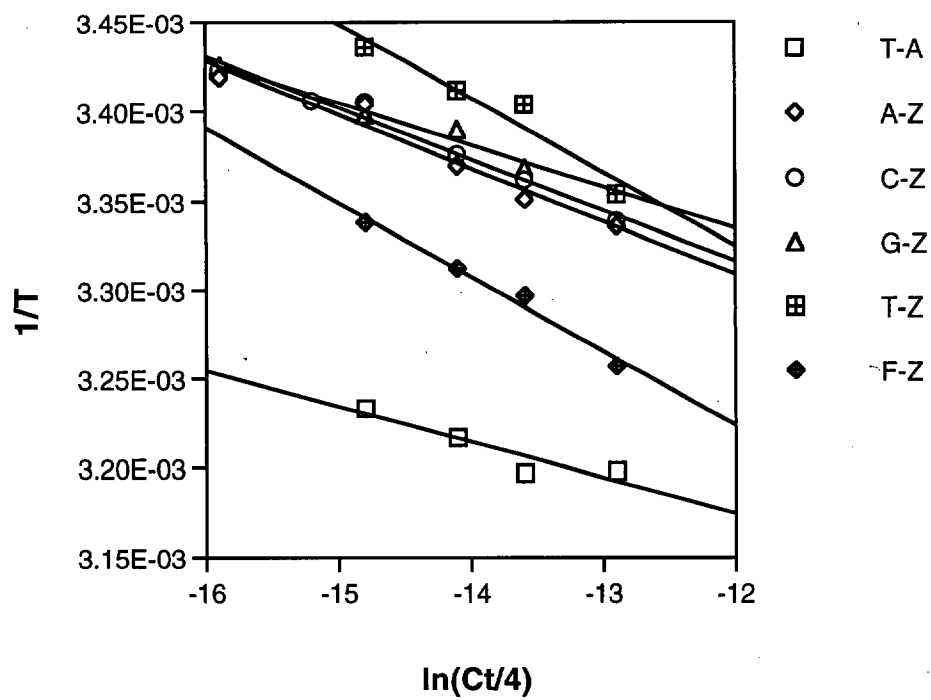

**Supplementary Material**

**1-[2-Deoxy-3,5,-bis-O-(4-toluoyl)- $\beta$ -D-erythro-pentofuranosyl]-4-methyl-1H-benzimidazole (6).** 4-Methyl-1H-benzimidazole<sup>17</sup> (1.5 g, 11.3 mmol) was dissolved in dry acetonitrile (180 mL) in an oven-dried flask under argon. The solution was cooled to 0 °C and sodium hydride 60% oil suspension (0.50 g, 12.5 mmol) was added in one portion to the solution and stirred for 30 min. The solution was cooled to -5 °C with a brine-ice bath and 1-chloro-2-deoxy-3,5-di-O-p-toluoyl- $\alpha$ -D-erythro-pentofuranose<sup>18</sup> (4.41 g, 11.3 mmol) was added portionwise as a solid over 1 h. After 2 h the reaction was quenched by addition of saturated sodium bicarbonate solution and the aqueous layer was washed with ethyl acetate. The organic layers were washed with brine and dried over anhydrous magnesium sulfate. The solution was filtered, concentrated, and purified by silica chromatography, eluting with hexanes-acetone (1:2). The fractions containing  $\beta$ -isomers were concentrated to yield 4.23 g (77%). Further chromatographic purification yielded 3.283 g (60%) of a mixture of the toluoyl-protected isomers **5** and **6** and 885 mg (16%) of pure **6**: <sup>1</sup>H-NMR (CDCl<sub>3</sub>, ppm)  $\delta$  8.00 (1H, s), 7.90 (2H, d, J=7.8 Hz), 7.82 (2H, d, J=7.8 Hz), 7.32 (1H, t, J=7.0 Hz), 7.20 (2H, d, J=7.8 Hz), 7.14 (2H, d, J=7.8 Hz), 7.10-6.85 (2H, m), 6.30 (1H, dd, J=6.0, 10.8 Hz), 5.62 (1H, m), 4.60 (1H, m), 4.52 (1H, m), 2.90-2.51 (2H, m), 2.55 (3H, s), 2.33 (3H, s), 2.30 (3H, s); <sup>13</sup>C-NMR (CDCl<sub>3</sub>, ppm)  $\delta$  165.88, 165.66, 144.23, 143.80, 143.39, 139.46, 132.10, 132.27, 129.54, 129.41, 129.04, 126.54, 126.29, 125.78, 123.04, 122.86, 107.98, 85.29, 82.14, 63.75, 60.05, 37.72, 21.43, 21.38, 16.45, 16.39; HRMS (DCI) calcd. for C<sub>29</sub>H<sub>28</sub>O<sub>5</sub>N<sub>2</sub> (M+1) 485.2076, found 485.2065.

**1-[2-Deoxy- $\beta$ -D-erythro-pentofuranosyl]-4-methyl-1H-benzimidazole (1).** 1-[2-Deoxy-3,5,-bis-O-(4-toluoyl)- $\beta$ -D-erythro-pentofuranosyl]-4-methyl-1H-benzimidazole (**6**) (885 mg, 1.82 mmol) was suspended in dry methanol (15 mL) and a 0.5 M solution of sodium methoxide in methanol (1.2 mL) was added. The reaction mixture was stirred at room temperature for 2 h. Solid ammonium chloride (2.5 g) was added and stirring was continued for 10 more min. The mixture was filtered, washed with methanol and concentrated. The crude product was purified by silica column chromatography (dichloromethane-methanol, 10:1) to obtain 402 mg (89%) of

nucleoside 1:  $^1\text{H-NMR}$  ( $\text{CD}_3\text{OD}$ , ppm)  $\delta$  8.42 (1H, s), 7.46 (1H, d,  $J=8.5$  Hz), 7.20 (1H, t,  $J=8.0$  Hz), 7.08 (1H, d,  $J=8.0$  Hz), 6.37 (1H, t,  $J=6.7$  Hz), 4.65 (1H, br s), 4.52 (1H, m), 4.00 (1H, m), 3.82-3.69 (2H, m), 2.73-2.41 (2H, m), 2.60 (3H, s);  $^{13}\text{C-NMR}$  ( $\text{CDCl}_3$ , ppm)  $\delta$  143.5, 142.0, 137.0, 134.5, 130.5, 124.7, 124.6, 109.7, 88.8, 86.4, 72.5, 63.1, 41.8, 17.0; HRMS (DCI) calcd. for  $\text{C}_{13}\text{H}_{16}\text{O}_3\text{N}_2$  ( $\text{M}+1$ ) 249.1239, found 249.1233.
